# Supplementary material
Source: MDPI journal article supplement (https://www.mdpi.com/1996-1073/8/3/1561)
Supplement: s1 [file s1]

**Supplementary Information**

**Table S1.** Sediment and pore water geochemistry data from C2, C3, C7 and C8. All isotope values are in units of per mil (‰) as described in the manuscript.

| **Core ID** | **Pore Water Depth Below Sea Floor (cm)** | **DIC (mM)** | **δ13CDIC** | **%OC** | **δ13CSOC** | **%CaCO3** | **δ13CTIC** | **DOC (mM)** | **δ13CDOC** | **Δ14CSOC** | **Gas Sample Depth Below Sea Floor (cm)** | **CH4 (mM)** | **Sediment δ13CCH4** | **Gas δ13CCH4** | **C1/C2** | **Gas Δ14CCH4** |
| --- | --- | --- | --- | --- | --- | --- | --- | --- | --- | --- | --- | --- | --- | --- | --- | --- |
| C2 | 5 | 2.8 | −9.4 | 0.91 | −20.5 | 13.04 | 1.8 | 0.95 | −22.9 | −283 | 0 | 6.00 × 10−4 | ND | ND | ND | ND |
|  | 35 | 3.3 | −14.6 | 0.67 | −21.1 | 11.55 | 1.6 | 0.91 | −20.8 | −561 | 30 | 9.34 × 10−4 | ND | ND | ND | ND |
|  | 70 | 4.2 | −19.9 | 0.52 | −22.7 | 8.82 | −2.2 | 0.82 | −20.1 | −665 | 65 | 8.13 × 10−4 | ND | ND | ND | ND |
|  | 105 | 5.0 | −23.3 | 0.70 | −22.8 | 2.71 | −4.9 | 0.85 | −23.2 | −652 | 100 | 8.73 × 10−4 | ND | ND | ND | ND |
|  | 140 | 5.2 | −25.8 | 0.76 | −22.8 | 2.4 | −5.8 | 1.30 | −25.3 | −650 | 135 | 1.01 × 10−3 | ND | ND | ND | ND |
|  | 165 | 5.9 | −28.6 | 0.72 | −22.7 | 2.36 | −5.8 | 1.16 | −26.2 | −647 | 160 | 1.10 × 10−3 | ND | ND | ND | ND |
|  | 190 | 7.3 | −31.9 | 0.71 | −22.6 | 2.42 | −6.1 | 1.23 | −25.4 | −647 | 185 | 1.00 × 10−3 | ND | ND | ND | ND |
|  | 215 | 8.2 | −32.7 | 0.73 | −22.4 | 2.52 | −5.9 | 0.88 | −24.4 | −657 | 210 | 1.31 × 10−3 | ND | ND | ND | ND |
|  | 240 | 8.4 | −33.8 | 0.75 | −22.4 | 2.54 | −6 | 1.13 | −24.6 | −643 | 235 | 1.45 × 10−3 | ND | ND | ND | ND |
|  | 265 | 9.5 | −36.2 | 0.72 | −22.4 | 2.33 | −5.9 | 1.47 | −24.2 | −651 | 260 | 1.38 × 10−3 | −48.8 | ND | ND | ND |
|  | 290 | 12.0 | −40.4 | 0.73 | −22.4 | 2.47 | −6.2 | 1.88 | −24.0 | −645 | 285 | 2.86 × 10−3 | −62.3 | ND | ND | ND |
|  | 310 | 15.6 | −43.7 | 0.64 | −22.9 | 2.53 | −4.3 | 2.24 | −23.9 | −679 | 305 | 1.13 × 10−2 | −66.8 | ND | ND | ND |
|  | 330 | 19.5 | −47.1 | 0.66 | −22.9 | 2.68 | −4 | 2.78 | −25.3 | −673 | 325 | 3.46 × 10−2 | −81.1 | ND | ND | ND |
|  | 350 | 20.0 | −41.5 | 0.78 | −22.7 | 4.13 | −5.3 | 3.59 | −23.8 | −624 | 345 | 1.39 × 100 | −86.9 | ND | ND | ND |
|  | 375 | 16.9 | −30.8 | 0.76 | −22.6 | 4.47 | −5.1 | 3.53 | −23.7 | −631 | 370 | 8.42 × 100 | −82.4 | ND | 26555 | ND |
|  | 400 | 14.3 | −22.4 | 0.77 | −22.8 | 4.31 | −5.3 | 3.60 | −23.6 | −640 | 395 | 8.91 × 100 | −79.7 | ND | 26926 | ND |
|  | 420 | 13.0 | −17.7 | 0.72 | −22.9 | 4.61 | −4.9 | 3.65 | −24.0 | −678 | 415 | 1.20 × 101 | −78.3 | ND | 29430 | ND |
|  | 440 | 11.9 | −13.4 | 0.71 | −23.0 | 4.02 | −5.1 | 3.59 | −24.4 | −659 | 435 | 1.25 × 101 | −77.9 | ND | ND | ND |
|  | 465 | 10.3 | −10.3 | 0.70 | −22.9 | 4.07 | −5.3 | 3.64 | −25.1 | −662 | 460 | 9.96 × 100 | −76.5 | ND | 30494 | ND |
| C3 | 5 | 13.6 | −42.9 | ND | ND | ND | ND | ND | ND | ND | 0 | 6.87 × 10−2 | −75.4 | ND | ND | ND |
|  | 25 | 15.6 | −16.6 | ND | ND | ND | ND | ND | ND | ND | 20 | 6.96 × 100 | −75.2 | ND | 6033 | ND |

**Table S1.** *Cont.*

| **Core ID** | **Pore Water Depth Below Sea Floor (cm)** | **DIC (mM)** | **δ13CDIC** | **%OC** | **δ13CSOC** | **%CaCO3** | **δ13CTIC** | **DOC (mM)** | **δ13CDOC** | **Δ14CSOC** | **Gas Sample Depth Below Sea Floor (cm)** | **CH4 (mM)** | **Sediment δ13CCH4** | **Gas δ13CCH4** | **C1/C2** | **Gas Δ14CCH4** |
| --- | --- | --- | --- | --- | --- | --- | --- | --- | --- | --- | --- | --- | --- | --- | --- | --- |
|  | 50 | 9.4 | −1.8 | ND | ND | ND | ND | ND | ND | ND | 45 | 3.52 × 100 | −75.3 | ND | 5244 | ND |
|  | 75 | 9.7 | 2.1 | ND | ND | ND | ND | ND | ND | ND | 70 | 7.87 × 100 | −73.0 | ND | 7313 | ND |
|  | 100 | 9.1 | 3.0 | ND | ND | ND | ND | ND | ND | ND | 95 | 3.74 × 100 | −73.1 | ND | 6122 | ND |
|  | 125 | 9.2 | 3.4 | ND | ND | ND | ND | ND | ND | ND | 120 | 3.36 × 100 | −73.5 | ND | 6873 | ND |
|  | 155 | 10.5 | 2.7 | ND | ND | ND | ND | ND | ND | ND | 150 | 3.61 × 100 | −73.1 | −72.5 ± 0.1, *n* = 3 | 6021 | −958 |
|  | 200 | 8.0 | 0.7 | ND | ND | ND | ND | ND | ND | ND | 195 | 3.80 × 100 | −72.8 | −72.0 | 6970 | −963 ± 3, *n* = 5 |
|  | 225 | 8.9 | −2.0 | ND | ND | ND | ND | ND | ND | ND | 220 | 4.28 × 100 | −73.2 | −72.4 | 6397 | −960 |
|  | 250 | 9.2 | 3.3 | ND | ND | ND | ND | ND | ND | ND | 245 | 4.98 × 100 | −73.6 | −72.1 | 6686 | −957 |
|  | 285 | 8.2 | 1.7 | ND | ND | ND | ND | ND | ND | ND | 280 | 3.69 × 100 | −73.2 | ND | 7461 | ND |
|  | 310 | 8.3 | 0.8 | ND | ND | ND | ND | ND | ND | ND | 305 | 4.14 × 100 | −73.4 | ND | 7033 | ND |
|  | 340 | 8.9 | 3.7 | ND | ND | ND | ND | ND | ND | ND | 335 | 4.37 × 100 | −73.3 | ND | 7299 | ND |
|  | 365 | 6.7 | 0.1 | ND | ND | ND | ND | ND | ND | ND | 360 | 4.28 × 100 | −73.7 | ND | 7380 | ND |
| C7 | 5 | 5.8 | 3.2 | 0.63 | −28.2 | 13.04 | −12.6 | 3.83 | −25.7 | −890 | 0 | 8.34 × 100 | −82.0 | ND | 9162 | ND |
|  | 34 | 12.1 | −48.1 | 0.66 | −26.4 | 10.36 | −3.99 | 2.05 | −27.6 | −907 | 29 | 4.71 × 100 | −73.0 | ND | 10602 | ND |
|  | 104 | 9.7 | −25.4 | 0.64 | −25.1 | 9.89 | −1.93 | 3.01 | −25.6 | −939 | 99 | 3.29 × 100 | −71.6 | ND | 7936 | ND |
|  | 144 | 8.3 | −15.0 | 0.62 | −25.0 | 9.93 | −1.5 | 3.55 | −25.4 | −939 | 139 | 5.61 × 100 | −69.3 | ND | 11753 | ND |
|  | 184 | 7.3 | −0.7 | 0.58 | −25.6 | 11.36 | −2.4 | 3.67 | −25.4 | −950 | 179 | 5.85 × 100 | −69.4 | ND | 8978 | ND |
|  | 224 | 7.1 | 3.0 | 0.57 | −26.6 | 12.68 | −1.7 | 3.77 | −25.5 | −955 | 219 | 4.82 × 100 | −69.1 | ND | 7017 | ND |
|  | 322 | 7.3 | 3.1 | 0.57 | −25.6 | 13.81 | −2.4 | 3.76 | −25.7 | −950 | 317 | 7.75 × 100 | −69.7 | ND | 8056 | ND |
|  | 372 | 7.4 | 2.5 | 0.58 | −25.3 | 12.08 | −1.1 | 3.69 | −26.1 | −947 | 367 | 6.06 × 100 | −69.3 | ND | 5716 | ND |
|  | 422 | 7.1 | 4.5 | 0.63 | −26.5 | 10.71 | −3.9 | 3.79 | −25.9 | −899 | 417 | 4.89 × 100 | −69.1 | ND | 7335 | ND |

**Table S1.** *Cont.*

| **Core ID** | **Pore Water Depth Below Sea Floor (cm)** | **DIC (mM)** | **δ13CDIC** | **%OC** | **δ13CSOC** | **%CaCO3** | **δ13CTIC** | **DOC (mM)** | **δ13CDOC** | **Δ14CSOC** | **Gas Sample Depth Below Sea Floor (cm)** | **CH4 (mM)** | **Sediment δ13CCH4** | **Gas δ13CCH4** | **C1/C2** | **Gas Δ14CCH4** |
| --- | --- | --- | --- | --- | --- | --- | --- | --- | --- | --- | --- | --- | --- | --- | --- | --- |
|  | 472 | 7.0 | 3.8 | 0.64 | −25.2 | 10.32 | −1.6 | 3.83 | −26.0 | −922 | 467 | 1.06 × 101 | −69.4 | ND | 5210 | ND |
|  | 522 | 6.5 | 3.4 | 0.58 | −25.3 | 11.71 | −1.3 | 3.92 | −26.7 | −950 | 517 | 7.77 × 100 | −68.5 | ND | 5836 | ND |
|  | 572 | 6.0 | 4.6 | 0.6 | −26.3 | 10.69 | −2.3 | 3.49 | −25.2 | −896 | 567 | 5.13 × 100 | −68.5 | −71.3 ± 0.1, *n* = 3 | 5967 | ND |
|  | 682 | 6.2 | 3.1 | 0.57 | −25.5 | 11.01 | −2.1 | 3.37 | −24.8 | −927 | 677 | 5.69 × 100 | −69.0 | ND | 3106 | ND |
|  | 732 | 6.8 | −1.5 | 0.58 | −25.3 | 11.46 | −1.6 | 3.73 | −24.7 | −929 | 727 | 5.29 × 100 | −69.0 | ND | 6213 | ND |
|  | 782 | 6.1 | 3.0 | 0.58 | −25.6 | 12.19 | −1.5 | 3.67 | −24.7 | −951 | 777 | 6.79 × 100 | −69.6 | ND | 5320 | ND |
|  | 842 | 5.6 | 2.5 | 0.63 | −25.3 | 10.9 | −1.2 | 3.41 | −24.8 | −918 | 837 | 6.57 × 100 | −69.2 | ND | 3572 | ND |
| C8 | 5 | 5.5 | −38.3 | ND | ND | ND | ND | ND | ND | ND | 0 | 2.71 × 10−2 | −73.3 | ND | ND | ND |
|  | 30 | 11.3 | −54.7 | ND | ND | ND | ND | ND | ND | ND | 25 | 8.76 × 10−2 | −78.9 | ND | ND | ND |
|  | 60 | 13.8 | −44.3 | ND | ND | ND | ND | ND | ND | ND | 55 | 7.10 × 100 | −85.2 | ND | 6777 | ND |
|  | 85 | 12.1 | −37.9 | ND | ND | ND | ND | ND | ND | ND | 80 | 9.92 × 100 | −81.8 | ND | 9108 | ND |
|  | 115 | 12.0 | −29.3 | ND | ND | ND | ND | ND | ND | ND | 110 | 1.30 × 101 | −80.1 | ND | 10562 | ND |
|  | 150 | 11.5 | −18.1 | ND | ND | ND | ND | ND | ND | ND | 145 | 9.77 × 100 | −78.6 | ND | 10021 | ND |
|  | 185 | 11.2 | −7.4 | ND | ND | ND | ND | ND | ND | ND | 180 | 7.23 × 100 | −76.9 | ND | 9691 | ND |
|  | 220 | 11.5 | −4.7 | ND | ND | ND | ND | ND | ND | ND | 215 | 5.21 × 100 | −76.0 | −65.8 | 7994 | −903 |
|  | 260 | 9.8 | 0.2 | ND | ND | ND | ND | ND | ND | ND | 255 | 5.32 × 100 | −74.5 | −70.9 | 6802 | −905 |
|  | 310 | 10.8 | 2.0 | ND | ND | ND | ND | ND | ND | ND | 305 | 5.46 × 100 | −75.3 | ND | 9054 | ND |
|  | 370 |  | 3.8 | ND | ND | ND | ND | ND | ND | ND | 365 | 4.96 × 100 | −73.7 | −72.3 | 8059 | −901 |
|  | 420 | 10.1 | 5.8 | ND | ND | ND | ND | ND | ND | ND | 415 | 3.95 × 100 | −73.6 | ND | 8036 | ND |
|  | 470 | 9.7 | 6.7 | ND | ND | ND | ND | ND | ND | ND | 465 | 2.85 × 100 | −71.5 | ND | 9362 | ND |
|  | 510 | 8.6 | 6.1 | ND | ND | ND | ND | ND | ND | ND | 505 | 4.11 × 100 | −72.5 | ND | 5450 | ND |
